# Supplementary material for: Receptor-Like Kinase RUPO Interacts with Potassium Transporters to Regulate Pollen Tube Growth and Integrity in Rice
Source: PubMed Central journal article supplement (PMC4957769; doi:10.1371/journal.pgen.1006085), 2016-07-22
Supplement: pgen.1006085.s017.pdf [file pgen.1006085.s017.pdf]

**Table S1.** Identification of 10 *in vitro* phosphorylation sites of RUPO.

| Peptide sequence <sup>a</sup>       | Position | Prec MW <sup>b</sup> | $\Delta$ Mass <sup>c</sup> | Confidence <sup>d</sup> | Score <sup>e</sup> |
|-------------------------------------|----------|----------------------|----------------------------|-------------------------|--------------------|
| SGYTFS[Pho]STLGLGR                  | 494 S    | 1424.6334            | -0.0003                    | 99                      | 81                 |
| SGYTFSS[Pho]TLGLGR                  | 495 S    | 1424.6387            | 0.0049                     | 99                      | 67                 |
| IQAAT[Pho]KNFE                      | 512 T    | 1100.4880            | -0.0022                    | 99                      | 33                 |
| IDDGT[Pho]KVAVKRGNPQSE              | 538 T    | 1892.9008            | 0.0016                     | 99                      | 71                 |
| DGPGMNQLHVS[Pho]TAVK                | 673 S    | 1632.7361            | 0.0029                     | 99                      | 76                 |
| DGPGMNQLHVST[Pho]AVK                | 674 T    | 1632.7354            | 0.0022                     | 99                      | 73                 |
| TLC[CAM]ARPPIDPQLPREQVS<br>[Pho]LAE | 726 S    | 2469.2075            | -0.0009                    | 99                      | 80                 |
| LAGT[Pho]VNQESLNK                   | 751 T    | 1352.6362            | 0.0025                     | 99                      | 88                 |
| LAGTVNQES[Pho]LNK                   | 756 S    | 1352.6331            | -0.0007                    | 99                      | 85                 |
| C[CAM]LAIEFGS[Pho]DR                | 773 S    | 1133.4200            | -0.0013                    | 99                      | 43                 |

<sup>a</sup>The amino acid sequence of phosphorylated peptides, where Ser/Thr phosphorylation and carbamidomethyl modification are denoted by [Pho],[CAM] respectively. <sup>b</sup>The experimentally measured monoisotopic mass for the precursor ion fragmented. <sup>c</sup>The difference in mass between the precursor MW and the theoretical MW of the matching peptide sequence. <sup>d</sup>Peptide confidence given by ProteinPilot 4.5. <sup>e</sup>Mascot score. Individual ion score >34 (for trypsin) or score >29 (for Glu-C) means the probability of random match is less than 0.05. In total, the MS/MS data covered > 96.95% amino acid sequence of the intracellular domain, including all Ser/Thr/Tyr residues except for Tyr- 588.
