# Supplementary material for: Receptor-Like Kinase RUPO Interacts with Potassium Transporters to Regulate Pollen Tube Growth and Integrity in Rice
Source: PubMed Central journal article supplement (PMC4957769; doi:10.1371/journal.pgen.1006085), 2016-07-22
Supplement: pgen.1006085.s018.pdf [file pgen.1006085.s018.pdf]

**Table S2.** List of primers.

| Description                      | Name       | Sequence                                                |
|----------------------------------|------------|---------------------------------------------------------|
| <b>Genotyping <i>rupo</i>+/-</b> | 12426F1    | AGGTCCTTGCCGTAGATGTG                                    |
|                                  | 12426R1    | AGGTGGTGTACCGGATCAAC                                    |
|                                  | Ngus-RB    | AACGCTGATCAATTCCACAG                                    |
| <b>Genomic cloning</b>           | NF4        | TCACTATGTATAACTTAATGTTGCACCAACAGTCA<br>AC               |
|                                  | NR4        | CCCAACCCCTCCTCTCACAACCCAA                               |
| <b>Promoter</b>                  | LF1        | TAGTTGGAATGGGTTCTGAATCACTATGTATAACTTA<br>ATGTTGCACCAACA |
|                                  | LR2        | TTATGGAGTTGGGTTCTGAAGGTGGTGGGGTGGCC<br>TACG             |
| <b>RT-PCR</b>                    | RLIP1-LP2  | GAGCCCGAGCTTCAACATG                                     |
|                                  | RLIP1-RP   | TCTCGGTGTTGAACTCGTTG                                    |
| <b>qPCR</b>                      | RLIP1-q1F  | TCGCCATCGCCAATCCAAGACA                                  |
|                                  | RLIP1-q1R  | TCGATCGTCGCGGTGGAACG                                    |
|                                  | 18SF       | CGGCTACCACATCCAAGGAA                                    |
|                                  | 18SR       | TGTCACTACCTCCCCGTGTCA                                   |
| <b>CRISPR lines</b>              | 127CF2     | CACTTCGTCCGCCTCTACCTCTTC                                |
|                                  | 127CR2     | GTTGATCCGGTACACCACCT                                    |
| <b>Complementation</b>           | F(HindIII) | AAGCTTGCACCAACAGTCAACCGAAACAT                           |
|                                  | R (EcoRI)  | GAATTCATCCCTGGTTACTTGATTAGTCTGTG                        |
|                                  | 127RP      | TCTCGGTGTTGAACTCGTTG                                    |
|                                  | RB         | AACGCTGATCAATTCCACAG                                    |
|                                  | d127LP     | CGGCGTACTACAAGGACATCGTCGT                               |
|                                  | d127RP-1   | TAGCGTTGTGATGGAGTGCATTCCAG                              |
|                                  | d127RP-2   | AGGTAAACCGCGTTGCTAAACCAGC                               |
| <b>pET-RUPO-N</b>                | 127NF1     | TTAGAATTCCAGGGGCGGCCGGTCCACC                            |
|                                  | 127NR1     | AACTCGAGGCGGCTGCCGCTGCCGTC                              |
| <b>Y2H related</b>               |            |                                                         |
| <b>Library construction</b>      | CDSIII     | ATTCTAGAGGCCGAGGCGGCCGACATG-d(T)30VN                    |
|                                  | SMARTIII   | AAGCAGTGGTATCAACGCAGAGTGGCCATTATGG<br>CCGGG             |
| <b>BD 515-845</b>                | 127YF2     | ACTGAATTCTTCGAGGAGAGCGCCATC                             |
|                                  | 127YR2     | CACGGATCCTCACCTCCCCTTCATGTC                             |
| <b>BD453-845</b>                 | 127YF3     | ACTGAATTCTGGTACAAGCGGCCCCAG                             |
|                                  | 127YR2     | CACGGATCCTCACCTCCCCTTCATGTC                             |
| <b>BD515-820</b>                 | 127YF2     | ACTGAATTCTTCGAGGAGAGCGCCATC                             |
|                                  | 127YR3     | CACGGATCCTCAGCCGGAGCCGGAG                               |
| <b>BD453-820</b>                 | 127YF3     | ACTGAATTCTGGTACAAGCGGCCCCAG                             |
|                                  | 127YR3     | CACGGATCCTCAGCCGGAGCCGGAG                               |
| <b>BD453-708</b>                 | 127YF3     | ACTGAATTCTGGTACAAGCGGCCCCAG                             |
|                                  | 127YR4     | ATAGGATCCTCACTCGAGGAGCACGACG                            |
| <b>BD515-708</b>                 | 127YF2     | ACTGAATTCTTCGAGGAGAGCGCCATC                             |

|                                |            |                                                         |
|--------------------------------|------------|---------------------------------------------------------|
| <b>BD453-788</b>               | 127YR4     | ATAGGATCCTCACTCGAGGAGCACGACG                            |
|                                | 127YF3     | ACTGAATTCTGGTACAAGCGGCCCCAG                             |
|                                | 127YR5     | ATAGGATCCTCACGCGTACTCGAGGTTTC                           |
| <b>BD515-788</b>               | 127YF2     | ACTGAATTCTTCGAGGAGAGCGCCATC                             |
|                                | 127YR5     | ATAGGATCCTCACGCGTACTCGAGGTTTC                           |
| <b>AD-OsHAK1-C</b>             | Potass YF2 | ATAGAATTCACGAGCTCGGCCGTGC                               |
|                                | Potass YR1 | CGCGGATCCCTAGATTTTCATACGTGA                             |
| <b>AD-OsHAK19-C</b>            | PTF4       | ATAGAATTCGCCGCGTTCCCTCCTCGA                             |
|                                | PTR2       | CGCGGATCCCTAAATCTCATAGGTGATC                            |
| <b>AD-OsHAK20-C</b>            | PTF5       | ATAGAATTCCTCAAGGTGTTTCGTCTAC                            |
|                                | PTR3       | CGCGGATCCCTAAATCTCATAAGTGATC                            |
| <b>Kinase activity related</b> |            |                                                         |
| <b>MBP-RUPO515</b>             | GSTKinaseF | TCTGGATCCTTCGAGGAGAGCGCCATC                             |
|                                | GSTKinaseR | TCTGAATTCCTCCCCTTCATGTCGGC                              |
| <b>MBP-RUPO</b>                | MBPF1      | TCTGGATCCCAG GGG CGG CCG GTC ACC                        |
|                                | HiskinaseR | TCTAAGCTTCCTCCCCTTCATGTCGGC                             |
| <b>Point mutation</b>          | K543R For  | CCAAGGTCGCCGTGAGGCGCGGGAAC                              |
|                                | K543R Rev  | CTCACGGCGACCTTGGTGCCGTCGTGC                             |
| <b>Localization</b>            |            |                                                         |
| <b>35S::RUPOΔC-GFP</b>         | 127DWF1    | ATACTCGAGATGCGCCGCCGCGGGAG                              |
|                                | 127DWR1    | CCGACTAGTCCGAGGCCGAGGGTGGAG                             |
| <b>Ubi::RUPO-GFP</b>           | 127DWF2    | ATAGGATCCATGCGCCGCCGCGGGAG                              |
|                                | 127DWR2    | ATAACTAGTGGCTGCAGCGGCCCTCCCCTTCAT<br>GTCG               |
| <b>Pull down related</b>       |            |                                                         |
| <b>GST-RUPO-C</b>              | GSTKinaseF | TCTGGATCCTTCGAGGAGAGCGCCATC                             |
|                                | HiskinaseR | TCTAAGCTTCCTCCCCTTCATGTCGGC                             |
| <b>MBP-OsHAK1-C</b>            | MBPHAKF1   | TATGGATCCACGAGCTCGGCCGTGC                               |
|                                | MBPHAKR1   | GAGAAGCTTCTAGATTTTCATACGTGA                             |
| <b>MBP-OsHAK19-C</b>           | MBPHAKF2   | TATGGATCCGCCGCGTTCCCTCCTCGA                             |
|                                | MBPHAKR2   | CGCAAGCTTCTAAATCTCATAGGTGATC                            |
| <b>MBP-OsHAK20-C</b>           | MBPHAKF3   | TATGGATCCCTCAAGGTGTTTCGTCTAC                            |
|                                | MBPHAKR3   | GGCAAGCTTCTAAATCTCATAAGTGATC                            |
| <b>Co-IP related</b>           |            |                                                         |
| <b>FLAG-RUPO-C</b>             | IPF2       | ATAACTAGTAGATTACAAGGATGACGACGATAAGT<br>CGAGGAGAGCGCCATC |
|                                | IPR1       | ATCGGATCCTCACCTCCCCTTCATGTC                             |
| <b>GFP-OsHAK1-C</b>            | IPKTF1     | GACTCTAGACACGAGCTCGGCCGTGC                              |
|                                | IPKTR1     | CGCGGATCCCTAGATTTTCATACGTGA                             |
| <b>GFP-OsHAK19-C</b>           | IPKTF2     | GACTCTAGACGCCGCGTTCCCTCCTCGA                            |
|                                | IPKTR2     | CGCGGATCCCTAAATCTCATAGGTGA                              |
| <b>GFP-OsHAK20-C</b>           | IPKTF3     | GACTCTAGACCTCAAGGTGTTTCGTCTAC                           |
|                                | IPKTR3     | CGCGGATCCCTAAATCTCATAAGTGA                              |

---
